# Supplementary material for: NADPH oxidase 1: A target in the capacity of dimeric ECG and EGCG procyanidins to inhibit colorectal cancer cell invasion
Source: PubMed Central journal article supplement (PMC10410180; doi:10.1016/j.redox.2023.102827), 2023-07-25
Supplement: mmc1.pdf [file mmc1.pdf]

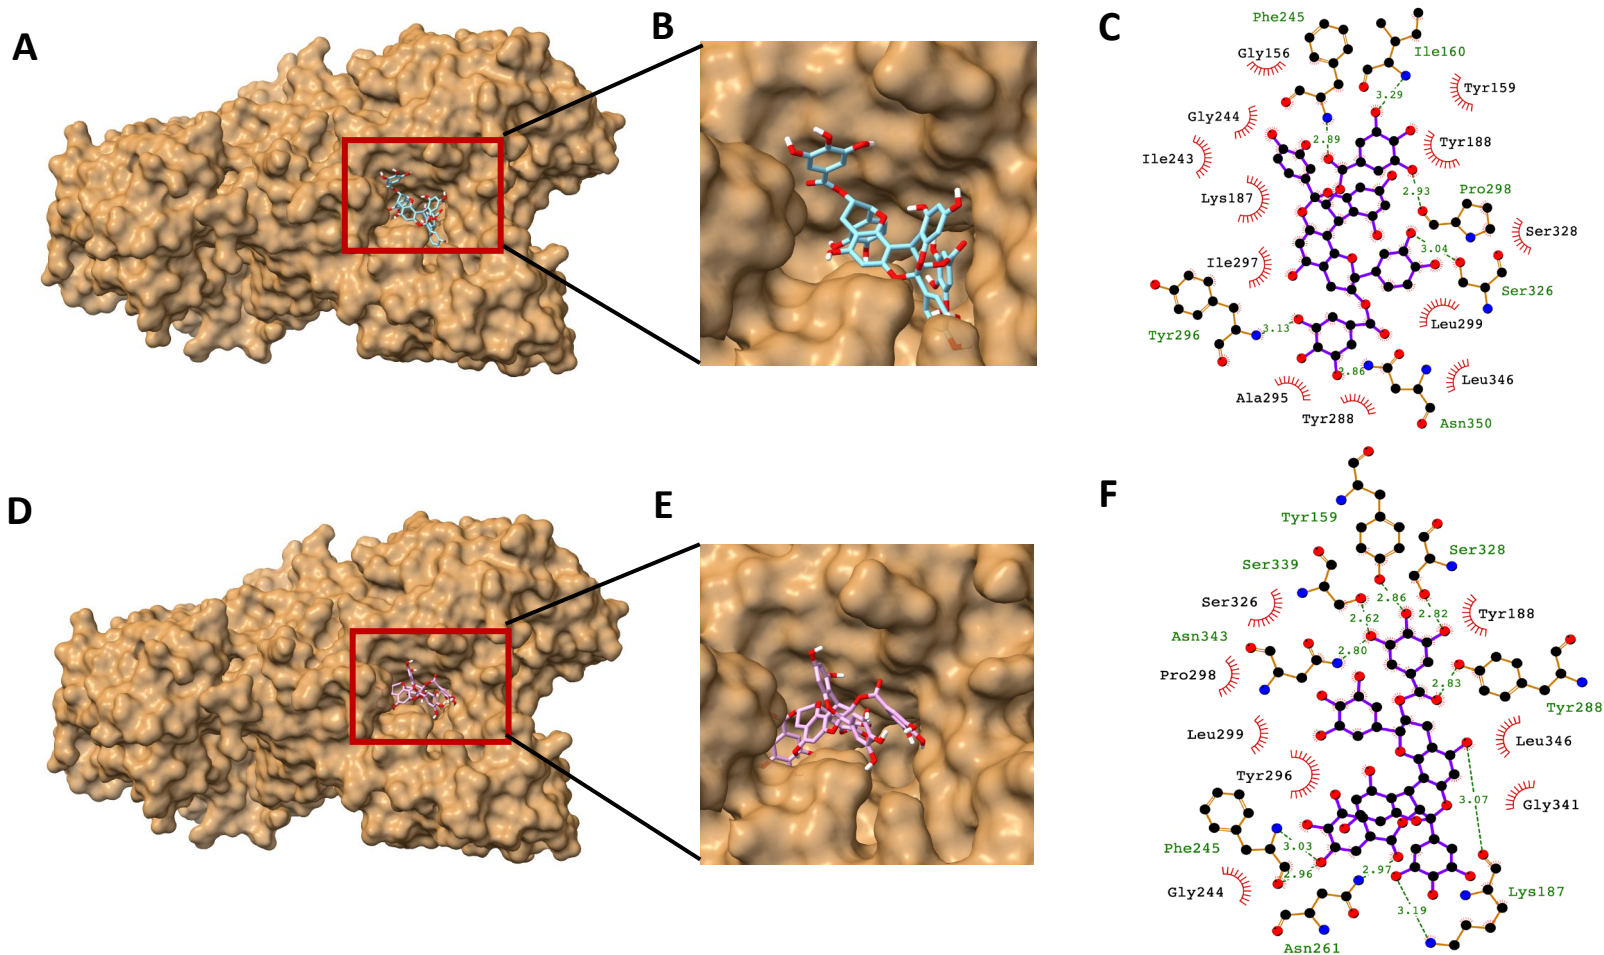

**Fig. S1. Potential interactions between ECG dimer (A, B, C), EGCG dimer (D, E, F) and NOX1 were characterized by molecular docking.** ECG and EGCG dimers can interact with the FAD binding pocket of NOX1 by hydrogen bonds and various hydrophobic interactions. Panels A, D indicate the position where dimers could bind to the enzyme. Panels B, E show an enlarged view of the binding pocket where dimers could interact with NOX1. Panels C, F show the amino acids in NOX1 that can establish hydrogen bonds (green) and various hydrophobic interactions (red) with the dimers.

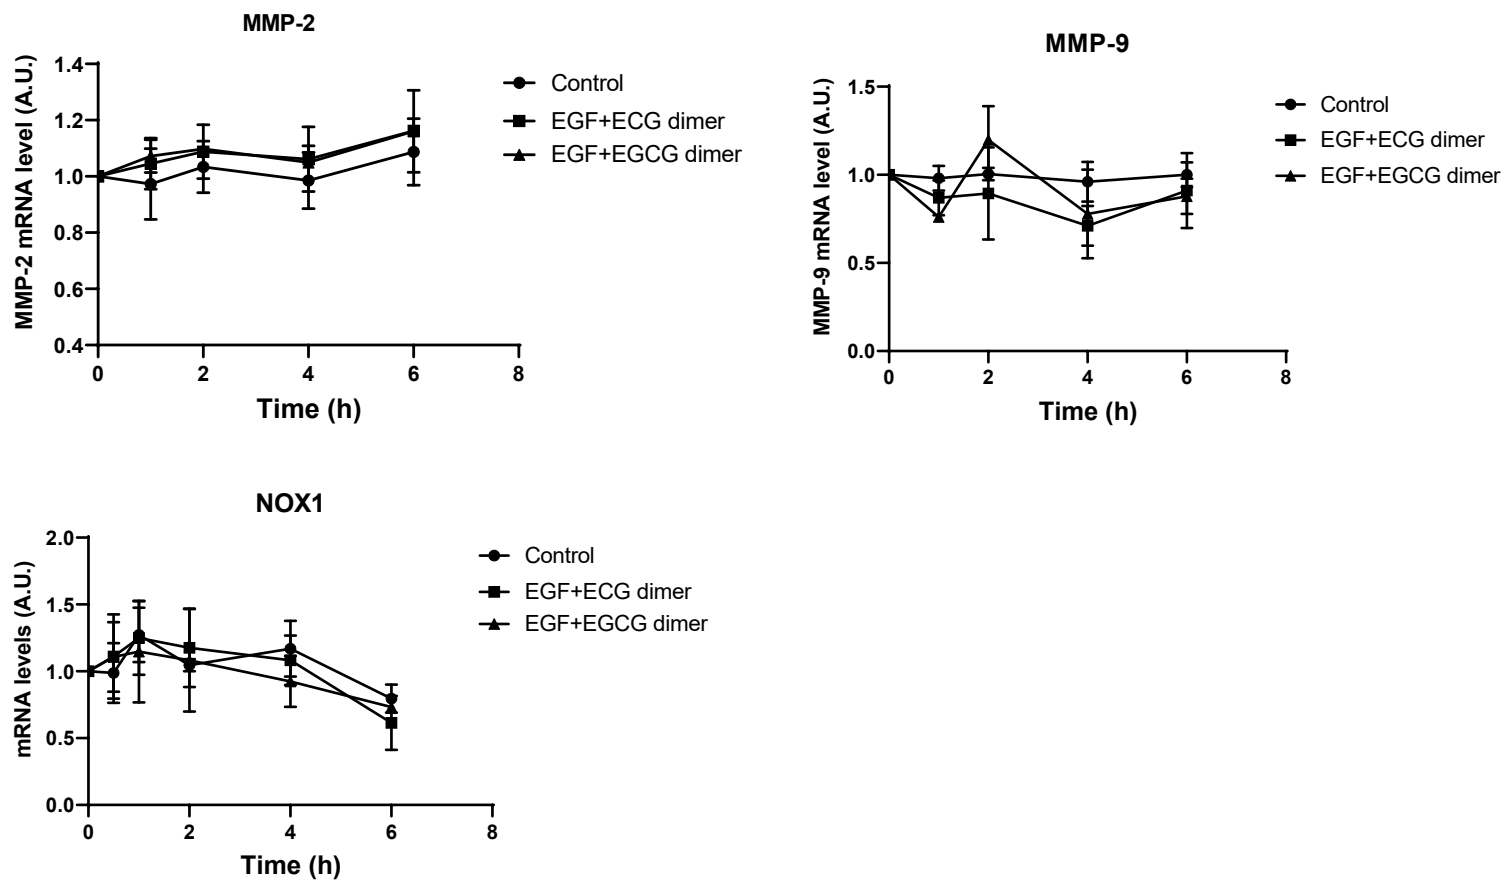

**Fig. S2. Effects of EGF and of the ECG and EGCG dimers on MMP-2, MMP-9 and NOX1 mRNA stability.** Cells were treated with or without EGF (10 ng/ml) and 10  $\mu$ M ECG dimer or 30  $\mu$ M EGCG dimers for 6 h. Then cells were treated by 10  $\mu$ g/ml actinomycin D to inhibit gene transcription. mRNA was isolated after 0, 0.5, 1, 2, 4, and 6 h incubation, and qPCR analysis was done for MMP-2, MMP-9 and NOX1 mRNAs. For the calculation,

we normalized the Ct average value of each time point to the Ct average value at t = 0 to obtain  $\Delta Ct$  values for the control (no additions) and treatment group ( $\Delta Ct = (\text{Average Ct of each time point} - \text{Average Ct of } t=0)$ ). To calculate the relative abundance for each time point we calculated  $2^{(-\Delta Ct)}$ . Results are shown as mean  $\pm$  SEM (n=3).
